# Supplementary material for: Principal component analysis-based unsupervised feature extraction applied to in silico drug discovery for posttraumatic stress disorder-mediated heart disease
Source: PubMed Central journal article supplement (PMC4448281; doi:10.1186/s12859-015-0574-4), 2015-04-30

# CARDIAC MUSCLE CONTRACTION

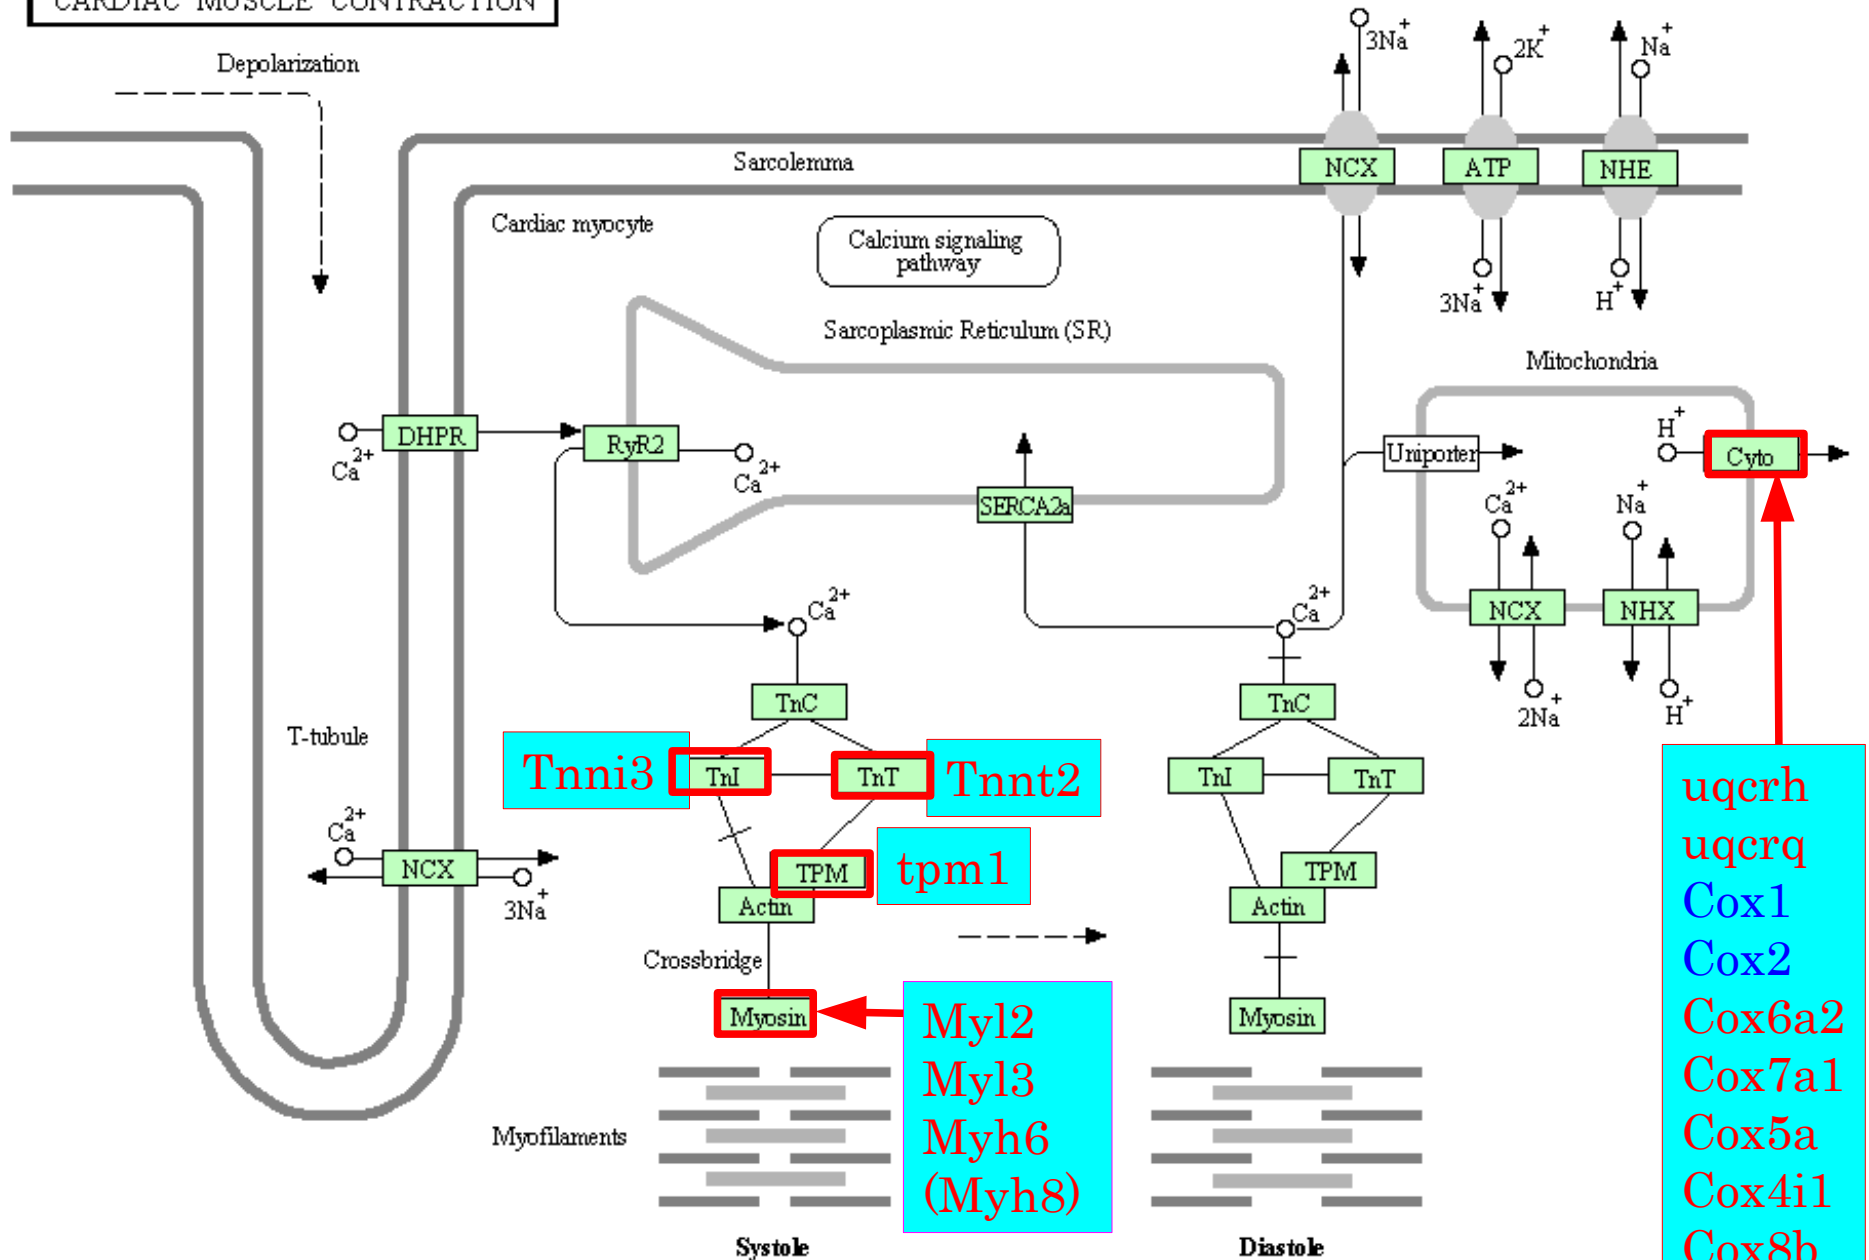

**HYPERTROPHIC CARDIOMYOPATHY (HCM)**

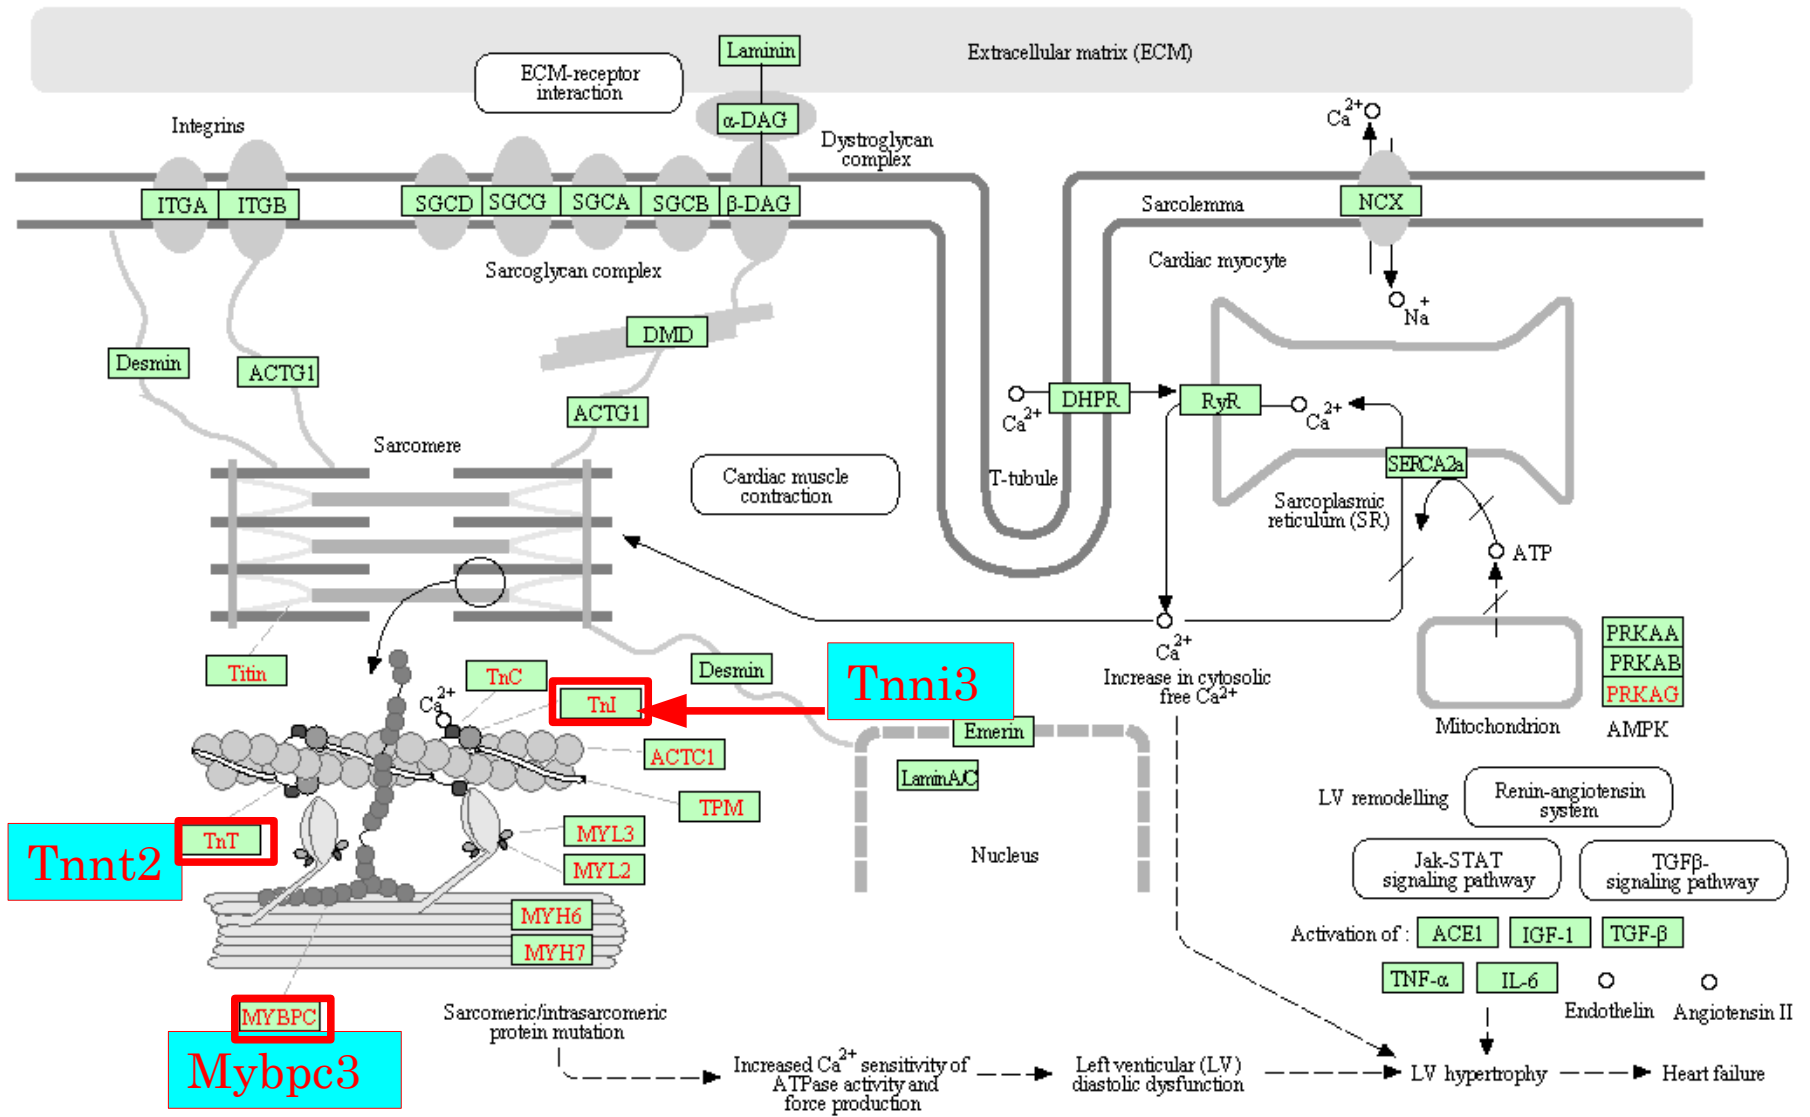

OXIDATIVE PHOSPHORYLATION

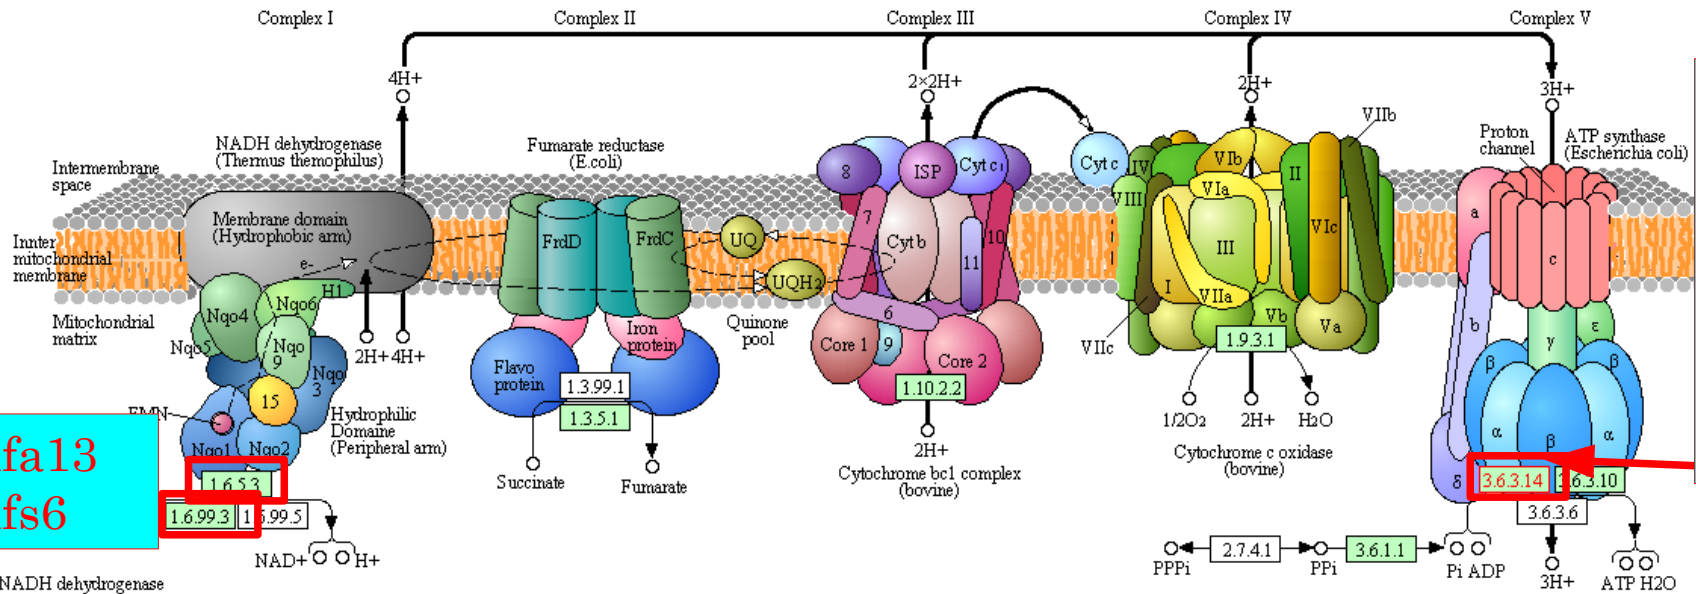

Ndufa13  
Ndufs6

Atp5g1  
Atp5b  
Atp5g3  
Atp5h  
Atp5a1  
Atp5e  
Atp5j2

NADH dehydrogenase

|     |         |         |         |         |         |         |         |         |         |          |          |         |         |         |      |      |      |
|-----|---------|---------|---------|---------|---------|---------|---------|---------|---------|----------|----------|---------|---------|---------|------|------|------|
| E   | ND1     | ND2     | ND3     | ND4     | ND4L    | ND5     | ND6     |         |         |          |          |         |         |         |      |      |      |
| E   | Ndufs1  | Ndufs2  | Ndufs3  | Ndufs4  | Ndufs5  | Ndufs6  | Ndufs7  | Ndufs8  | Ndulfv1 | Ndulfv2  | Ndulfv3  |         |         |         |      |      |      |
| B/A | NuoA    | NuoB    | NuoC    | NuoD    | NuoE    | NuoF    | NuoG    | NuoH    | NuoI    | NuoJ     | NuoK     | NuoL    | NuoM    | NuoN    |      |      |      |
| B/A | NdhC    | NdhK    | NdhJ    | NdhH    | NdhA    | NdhI    | NdhG    | NdhE    | NdhF    | NdhD     | NdhB     | NdhL    | NdhM    | NdhN    | HoxE | HoxF | HoxU |
| E   | Ndufa1  | Ndufa2  | Ndufa3  | Ndufa4  | Ndufa5  | Ndufa6  | Ndufa7  | Ndufa8  | Ndufa9  | Ndufa10  | Ndufab1  | Ndufa11 | Ndufa12 | Ndufa13 |      |      |      |
| E   | Ndulfb1 | Ndulfb2 | Ndulfb3 | Ndulfb4 | Ndulfb5 | Ndulfb6 | Ndulfb7 | Ndulfb8 | Ndulfb9 | Ndulfb10 | Ndulfb11 | Ndulfc1 | Ndulfc2 |         |      |      |      |

Succinate dehydrogenase / Fumarate reductase

|     |      |      |      |      |      |  |  |  |
|-----|------|------|------|------|------|--|--|--|
| E   | SDHC | SDHD | SDHA | SDHB |      |  |  |  |
| B/A | SdhC | SdhD | SdhA | SdhB |      |  |  |  |
|     |      | FrdA | FrdB | FrdC | FrdD |  |  |  |

Cytochrome c reductase

|       |      |       |       |      |      |      |       |  |  |
|-------|------|-------|-------|------|------|------|-------|--|--|
| E/B/A | ISP  | Cyt b | Cyt 1 |      |      |      |       |  |  |
| E     | COR1 | QCR2  | QCR6  | QCR7 | QCR8 | QCR9 | QCR10 |  |  |

Cytochrome c oxidase

|     |       |      |      |      |      |       |       |       |       |       |       |       |       |      |       |       |       |       |       |       |
|-----|-------|------|------|------|------|-------|-------|-------|-------|-------|-------|-------|-------|------|-------|-------|-------|-------|-------|-------|
| E   | COX10 | COX3 | COX1 | COX2 | COX4 | COX5A | COX5B | COX6A | COX6B | COX6C | COX7A | COX7B | COX7C | COX8 | E/B/A | COX11 | COX15 | COX17 |       |       |
| B/A | CyoE  | CyoD | CyoC | CyoB | CyoA |       |       |       |       |       |       |       |       |      |       |       |       | COX11 | COX15 | COX17 |
|     |       | CoxD | CoxC | CoxA | CoxB |       |       |       |       |       |       |       |       |      |       |       |       |       |       |       |
|     |       | QoxD | QoxC | QoxB | QoxA |       |       |       |       |       |       |       |       |      |       |       |       |       |       |       |

Cytochrome c oxidase, cbb3-type

|   |   |    |    |     |
|---|---|----|----|-----|
| B | I | II | IV | III |
|---|---|----|----|-----|

Cytochrome bd complex

|     |      |      |
|-----|------|------|
| B/A | CydA | CydB |
|-----|------|------|

F-type ATPase (Bacteria)

|      |       |       |       |         |   |   |   |
|------|-------|-------|-------|---------|---|---|---|
| beta | alpha | gamma | delta | epsilon | c | a | b |
|------|-------|-------|-------|---------|---|---|---|

F-type ATPase (Eukaryotes)

|      |       |       |      |       |         |   |   |
|------|-------|-------|------|-------|---------|---|---|
| beta | alpha | gamma | OSCP | delta | epsilon | c | a |
| b    | e     | f6    | f    | 8     |         |   |   |
| d    | f     | h     | j    | k     | g       |   |   |

V-type ATPase (Prokaryotes)

|   |   |   |   |   |   |   |   |
|---|---|---|---|---|---|---|---|
| A | B | C | D | E | F | I | K |
|---|---|---|---|---|---|---|---|

V-type ATPase (Eukaryotes)

|   |      |      |    |       |   |   |   |
|---|------|------|----|-------|---|---|---|
| A | B    | C    | D  | E     | F | G | H |
| I | AC39 | 54kD | S1 | lipid |   |   |   |

CITRATE CYCLE (TCA CYCLE)

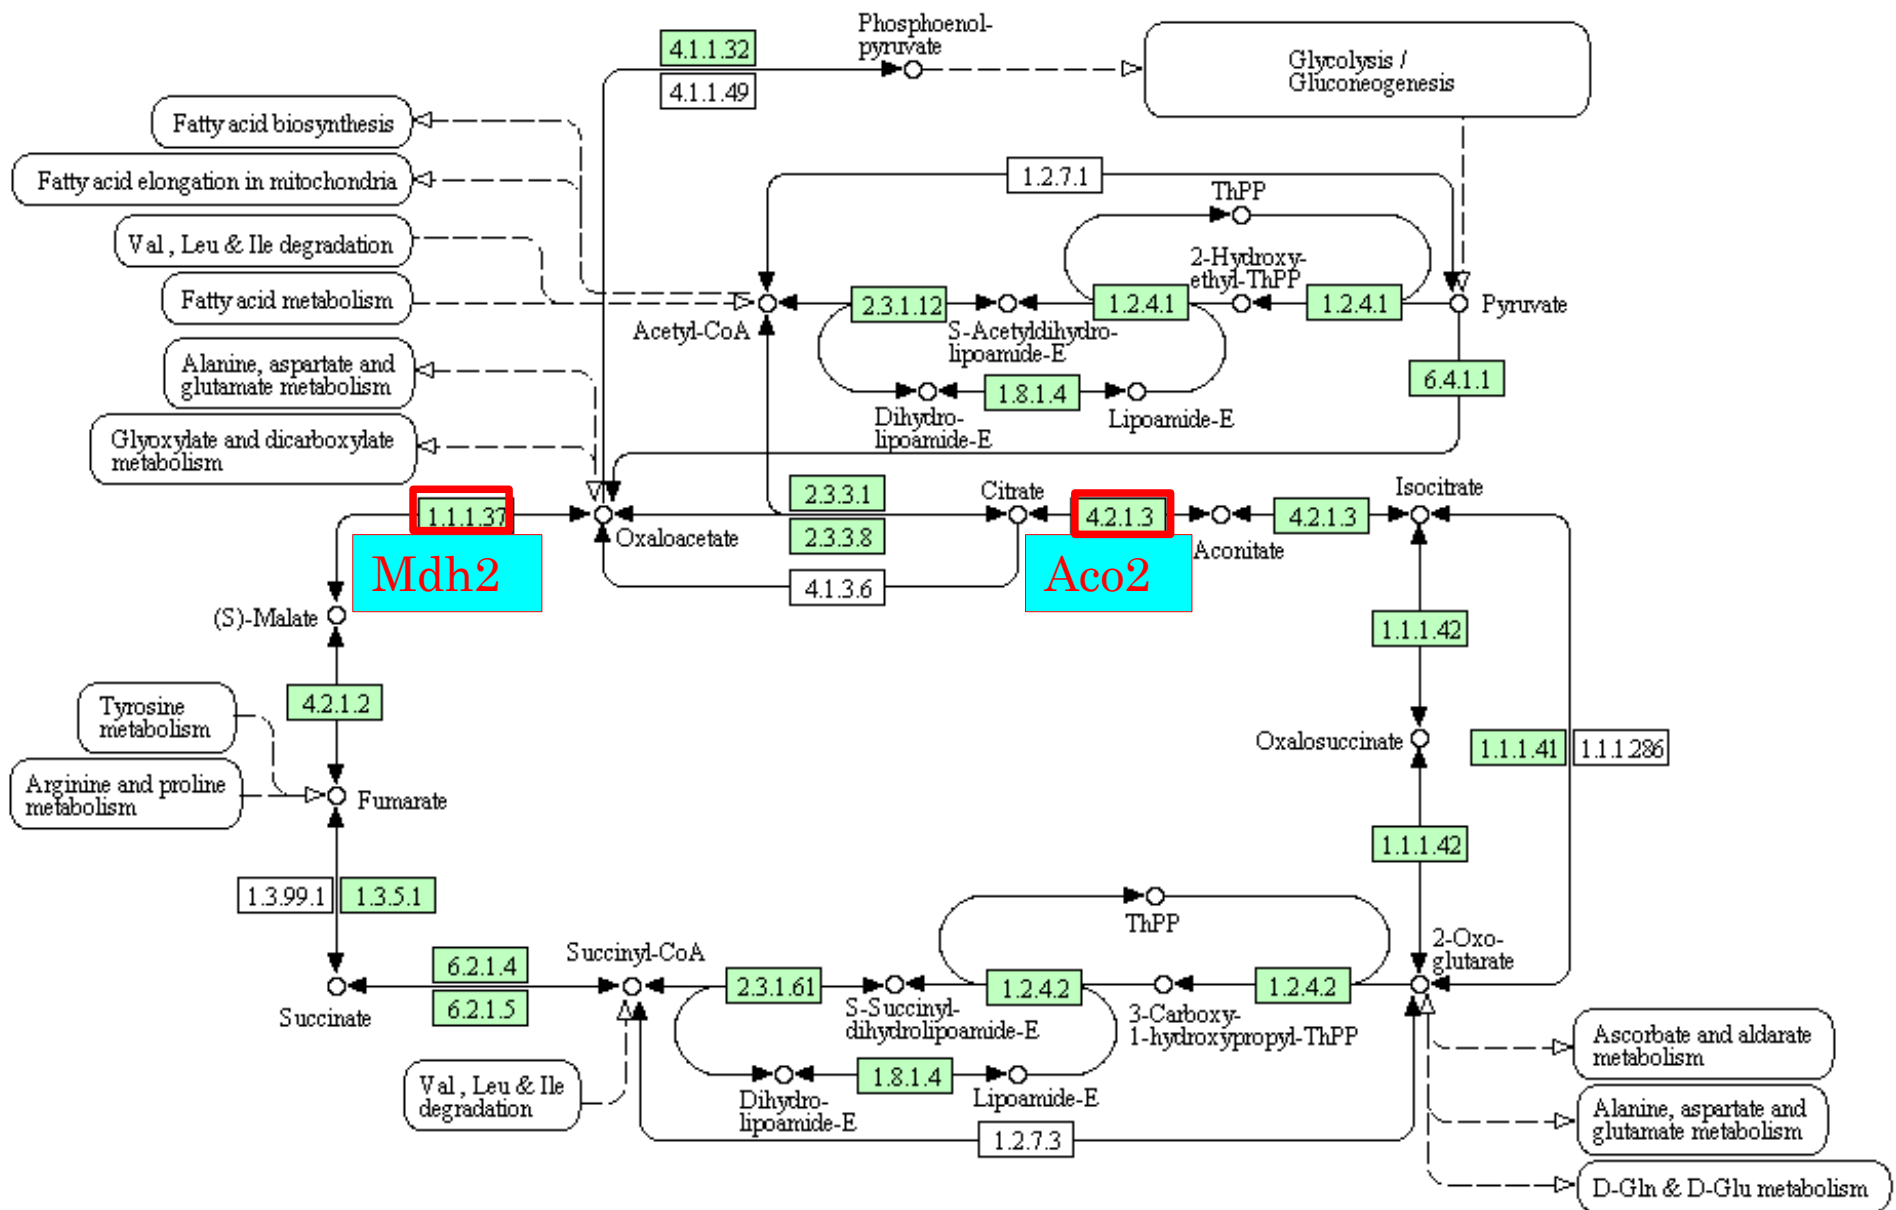

PPAR SIGNALING PATHWAY

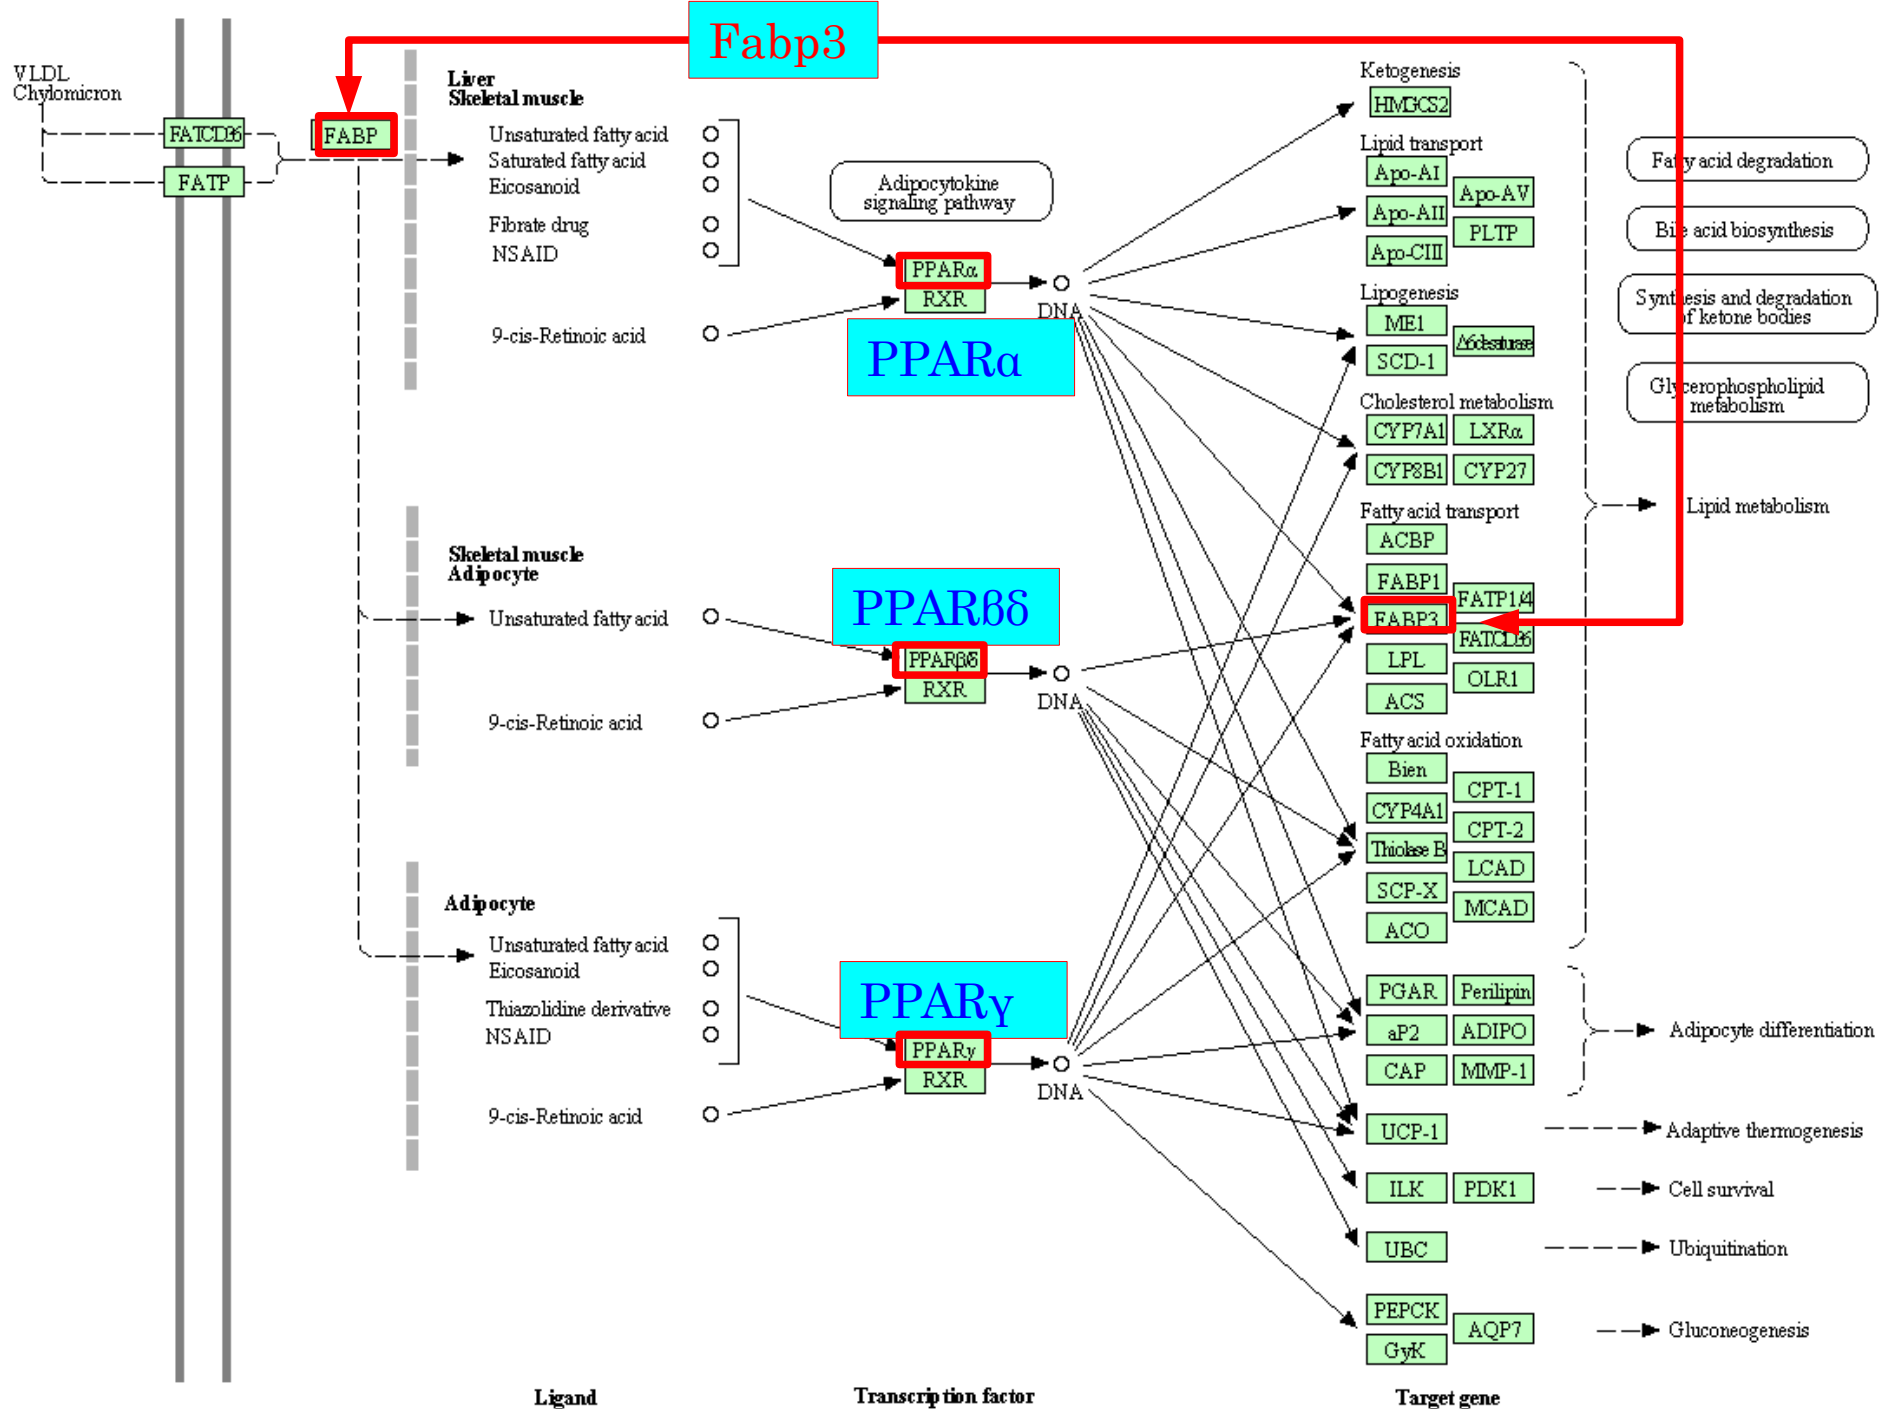

Supplement: 12859_2015_574_MOESM6_ESM.pdf [file 12859_2015_574_MOESM6_ESM.pdf]
