# Supplementary material for: Principal component analysis-based unsupervised feature extraction applied to in silico drug discovery for posttraumatic stress disorder-mediated heart disease
Source: PubMed Central journal article supplement (PMC4448281; doi:10.1186/s12859-015-0574-4), 2015-04-30
Supplement: 12859_2015_574_MOESM5_ESM.pdf [file 12859_2015_574_MOESM5_ESM.pdf]

Table 1: 15 genes targeted by at least one of selected 27 miRNAs

| Gene                  | RefSeq mRNA  | miRNA that target miRNA                                                                   |
|-----------------------|--------------|-------------------------------------------------------------------------------------------|
| <i>Synrg</i>          | NM_194341    | miR-451, miR-22-3p, miR-709, miR-143-3p, miR-126-5p, miR-16, miR-1983, miR-207            |
| <i>Uba52</i>          | NM_019883    | miR-133a-3p, miR-133b-3p                                                                  |
| <i>Crip2</i>          | NM_024223    | miR-709                                                                                   |
| <i>Uqcrq</i>          | NM_025352    | miR-709                                                                                   |
| <i>1700047I17Rik2</i> | NM_001100116 | miR-30c-5p, miR-29a-3p, miR-133a-3p, miR-30b-5p, miR-29b-3p, miR-16, miR-30e-5p, miR-1983 |
| <i>Rplp0</i>          | NM_007475    | miR-30c-5p, miR-30b-5p, miR-30e-5p                                                        |
| <i>Hbb-bt</i>         | NM_008220    | miR-143-3p                                                                                |
| <i>Ndufa13</i>        | NM_023312    | miR-24-3p                                                                                 |
| <i>Pebp1</i>          | NM_018858    | miR-24-3p                                                                                 |
| <i>Exosc2</i>         | NM_144886    | miR-378a-5p                                                                               |
| <i>Pbld1</i>          | NM_026701    | miR-125b-5p                                                                               |
| <i>2610028H24Rik</i>  | NM_029816    | miR-125b-5p                                                                               |
| <i>Medag</i>          | NM_027519    | let-7b-5p, let-7g-5p                                                                      |
| <i>Tpt1</i>           | NM_194341    | miR-16                                                                                    |
| <i>Uqcrh</i>          | NM_025641    | miR-691                                                                                   |

Table 2: 17 genes associated with heart diseases but not targeted by any of selected 27 miRNAs

| RefSeq mRNA  | Gene           | Heart disease association ( $P$ -values)                                                                                                                                                                                            |
|--------------|----------------|-------------------------------------------------------------------------------------------------------------------------------------------------------------------------------------------------------------------------------------|
| NM_007450    | <i>Slc25a4</i> | Cardiomyopathies ( $3.3 \times 10^{-5}$ ) ; Cardiomegaly ( $1.6 \times 10^{-2}$ )                                                                                                                                                   |
| NM_001164248 | <i>Tpm1</i>    | Cardiomyopathy, Hypertrophic, Familial ( $6.0 \times 10^{-18}$ ), Cardiomyopathy, Dilated ( $9.6 \times 10^{-5}$ ), Cardiomyopathy, Hypertrophic ( $5.2 \times 10^{-3}$ ), Heart Diseases ( $9.1 \times 10^{-3}$ )                  |
| NM_001164171 | <i>Myh6</i>    | Cardiomyopathy, Hypertrophic ( $4.9 \times 10^{-42}$ ), Heart Defects, Congenital ( $2.5 \times 10^{-28}$ ), Cardiomyopathy, Dilated ( $3.0 \times 10^{-12}$ ), Cardiomegaly ( $3.1 \times 10^{-12}$ )                              |
| NM_008218    | <i>Hba-a1</i>  | Cardiomegaly ( $1.7 \times 10^{-2}$ )                                                                                                                                                                                               |
| NM_013593    | <i>Mb</i>      | Myocardial Infarction ( $9.0 \times 10^{-52}$ ), Myocardial Ischemia ( $4.8 \times 10^{-18}$ ), Myocardial Reperfusion Injury ( $8.8 \times 10^{-11}$ ), Angina Pectoris ( $8.5 \times 10^{-17}$ )                                  |
| NM_011619    | <i>Tnnt2</i>   | Cardiomyopathy, Hypertrophic ( $5.9 \times 10^{-17}$ ), Cardiomyopathy, Dilated ( $1.1 \times 10^{-11}$ ), Cardiomyopathy, Hypertrophic, Familial ( $4.0 \times 10^{-10}$ ), Ventricular Dysfunction, Left ( $3.7 \times 10^{-7}$ ) |
| NM_008084    | <i>Gapdh</i>   | Cardiomyopathy, Dilated ( $1.6 \times 10^{-3}$ ), Heart Diseases ( $9.6 \times 10^{-3}$ ), Myocardial Infarction ( $3.4 \times 10^{-2}$ ), Heart Defects, Congenital ( $3.4 \times 10^{-2}$ )                                       |
| NM_009944    | <i>Cox7a1</i>  | Chagas Cardiomyopathy ( $1.2 \times 10^{-4}$ ), Myocarditis ( $1 \times 10^{-3}$ )                                                                                                                                                  |
| NM_175329    | <i>Chchd10</i> | Cardiovascular Diseases ( $3.1 \times 10^{-3}$ )                                                                                                                                                                                    |
| NM_016774    | <i>Atp5b</i>   | Cardiomyopathies ( $3.8 \times 10^{-3}$ )                                                                                                                                                                                           |
| NM_008653    | <i>Mybpc3</i>  | Cardiomyopathy, Hypertrophic ( $1.7 \times 10^{-11}$ ), Ventricular Dysfunction, Left ( $1.4 \times 10^{-7}$ ), Cardiomyopathy, Dilated ( $3.5 \times 10^{-7}$ ), Cardiomyopathy, Hypertrophic, Familial ( $5.3 \times 10^{-7}$ )   |
| NM_009964    | <i>Cryab</i>   | Cardiomyopathies ( $4.0 \times 10^{-13}$ ), Myocardial Ischemia ( $7.1 \times 10^{-8}$ ), Myocardial Reperfusion Injury ( $6.4 \times 10^{-6}$ ), Heart Failure ( $3.1 \times 10^{-5}$ )                                            |
| NM_009406    | <i>Tnni3</i>   | Cardiomyopathy, Dilated ( $7.5 \times 10^{-12}$ ), Cardiomyopathy, Hypertrophic, Familial ( $3.1 \times 10^{-10}$ ), Ventricular Dysfunction, Left ( $2.9 \times 10^{-7}$ ), Cardiomyopathies ( $1.1 \times 10^{-6}$ )              |
| NM_198415    | <i>Ckmt2</i>   | Hypertrophy, Left Ventricular ( $1.4 \times 10^{-3}$ ), Cardiomyopathy, Dilated ( $2.0 \times 10^{-3}$ ), Myocardial Reperfusion Injury ( $2.9 \times 10^{-3}$ ), Myocardial Ischemia ( $3.2 \times 10^{-3}$ )                      |
| NM_007505    | <i>Atp5a1</i>  | Cardiomyopathies ( $7.7 \times 10^{-3}$ )                                                                                                                                                                                           |
| NM_177369    | <i>Myh8</i>    | Heart Defects, Congenital ( $2.6 \times 10^{-3}$ )                                                                                                                                                                                  |
| NM_010212    | <i>Fhl2</i>    | Heart Defects, Congenital ( $7.7 \times 10^{-5}$ ), Cardiomyopathies ( $1.2 \times 10^{-2}$ ), Cardiomegaly ( $2.2 \times 10^{-2}$ ), Myocardial Infarction ( $3.1 \times 10^{-2}$ )                                                |

Table 3: 18 genes neither associated with heart diseases nor targeted by any of selected 27 miRNAs

| RefSeq       | gene          |
|--------------|---------------|
| NM_001083955 | <i>Hba-a2</i> |
| NM_001033435 | <i>Milr1</i>  |
| NM_008617    | <i>Mdh2</i>   |
| NM_024166    | <i>Chchd2</i> |
| NM_175015    | <i>Atp5g3</i> |
| NM_026614    | <i>Ndufa5</i> |
| NM_027862    | <i>Atp5h</i>  |
| NM_170759    | <i>Zfp628</i> |
| NM_010888    | <i>Ndufs6</i> |
| NM_007751    | <i>Cox8b</i>  |
| NM_010239    | <i>Fth1</i>   |
| NM_173011    | <i>Idh2</i>   |
| NM_023374    | <i>Sdhb</i>   |
| NM_053071    | <i>Cox6c</i>  |
| NM_025983    | <i>Atp5e</i>  |
| NM_080633    | <i>Aco2</i>   |
| NM_031165    | <i>Hspa8</i>  |
| NM_020582    | <i>Atp5j2</i> |
