# Supplementary material for: Principal component analysis-based unsupervised feature extraction applied to in silico drug discovery for posttraumatic stress disorder-mediated heart disease
Source: PubMed Central journal article supplement (PMC4448281; doi:10.1186/s12859-015-0574-4), 2015-04-30
Supplement: 12859_2015_574_MOESM9_ESM.pdf [file 12859_2015_574_MOESM9_ESM.pdf]

Stability analysis of categorical regression based FE

|                  |     |    |    |    |    |    |    |    |    |    |    |    |    |    |    |     |           |     |    |          |
|------------------|-----|----|----|----|----|----|----|----|----|----|----|----|----|----|----|-----|-----------|-----|----|----------|
| mRNA             |     |    |    |    |    |    |    |    |    |    |    |    |    |    |    |     |           |     |    |          |
| frequency        | 1   | 2  | 3  | 4  | 5  | 6  | 7  | 8  | 9  | 10 | 11 | 12 | 13 | 14 | 15 | 16  | 17        | 18  | 19 | 20       |
| number of probes | 122 | 61 | 25 | 17 | 15 | 18 | 8  | 9  | 10 | 6  | 6  | 13 | 7  | 6  | 7  | 4   | 4         | 2   | 5  | 1        |
| frequency        | 21  | 22 | 23 | 24 | 25 | 26 | 27 | 28 | 29 | 30 | 31 | 32 | 33 | 34 | 36 | 37  | 39        | 40  | 42 | 43       |
| number of probes | 7   | 1  | 6  | 5  | 2  | 4  | 6  | 3  | 5  | 5  | 2  | 2  | 3  | 3  | 5  | 3   | 4         | 2   | 4  | 1        |
| frequency        | 44  | 45 | 46 | 47 | 48 | 49 | 50 | 51 | 55 | 57 | 58 | 60 | 62 | 63 | 65 | 67  | 68        | 71  | 72 | 74       |
| number of probes | 1   | 1  | 4  | 2  | 1  | 3  | 2  | 2  | 1  | 1  | 1  | 1  | 1  | 1  | 1  | 1   | 1         | 1   | 1  | 1        |
| frequency        | 75  | 77 | 78 | 79 | 82 | 83 | 84 | 87 | 88 | 90 | 94 | 95 | 96 | 97 | 99 | 100 |           |     |    |          |
| number of probes | 1   | 1  | 1  | 1  | 3  | 1  | 4  | 1  | 1  | 2  | 1  | 2  | 1  | 1  | 2  | 3   | <b>24</b> |     |    |          |
| miRNA            |     |    |    |    |    |    |    |    |    |    |    |    |    |    |    |     |           |     |    |          |
| frequency        | 1   | 2  | 3  | 4  | 5  | 6  | 7  | 8  | 9  | 10 | 11 | 12 | 13 | 14 | 15 | 16  | 17        | 18  | 19 | 20       |
| number of probes | 33  | 29 | 15 | 17 | 3  | 10 | 5  | 8  | 9  | 7  | 2  | 1  | 2  | 4  | 1  | 5   | 2         | 2   | 6  | 1        |
| frequency        | 21  | 22 | 23 | 24 | 25 | 26 | 27 | 28 | 29 | 30 | 31 | 32 | 33 | 35 | 36 | 37  | 38        | 39  | 40 | 41       |
| number of probes | 2   | 4  | 1  | 5  | 3  | 2  | 4  | 2  | 2  | 4  | 3  | 1  | 1  | 3  | 1  | 1   | 1         | 4   | 3  | 5        |
| frequency        | 42  | 43 | 44 | 46 | 47 | 48 | 49 | 50 | 52 | 53 | 55 | 56 | 57 | 59 | 60 | 61  | 66        | 67  | 68 | 70       |
| number of probes | 2   | 1  | 2  | 2  | 3  | 1  | 2  | 2  | 2  | 1  | 2  | 3  | 2  | 1  | 4  | 1   | 2         | 2   | 2  | 1        |
| frequency        | 71  | 74 | 76 | 77 | 78 | 80 | 81 | 82 | 83 | 84 | 86 | 87 | 88 | 89 | 91 | 93  | 95        | 100 |    |          |
| number of probes | 1   | 2  | 1  | 1  | 1  | 1  | 1  | 1  | 2  | 2  | 1  | 5  | 1  | 2  | 3  | 2   | 2         | 2   | 2  | <b>8</b> |

---

Stability analysis of BAHSIC

---

|                  |      |     |     |     |     |     |    |    |    |    |    |    |    |    |    |           |
|------------------|------|-----|-----|-----|-----|-----|----|----|----|----|----|----|----|----|----|-----------|
| mRNA             |      |     |     |     |     |     |    |    |    |    |    |    |    |    |    |           |
| frequency        | 1    | 2   | 3   | 4   | 5   | 6   | 7  | 8  | 9  | 10 | 11 | 12 | 13 | 14 |    |           |
| number of probes | 2133 | 886 | 474 | 280 | 197 | 136 | 84 | 55 | 41 | 14 | 7  | 6  | 4  | 1  |    |           |
| miRNA            |      |     |     |     |     |     |    |    |    |    |    |    |    |    |    |           |
| frequency        | 1    | 3   | 4   | 20  | 21  | 25  | 32 | 40 | 41 | 43 | 45 | 60 | 61 | 62 | 69 | 70        |
| number of probes | 2    | 1   | 1   | 1   | 3   | 1   | 1  | 1  | 1  | 1  | 1  | 1  | 1  | 1  | 1  | 1         |
| frequency        | 73   | 74  | 75  | 77  | 79  | 82  | 86 | 87 | 90 | 93 | 95 | 96 | 97 | 98 | 99 | 100       |
| number of probes | 3    | 2   | 1   | 3   | 6   | 1   | 1  | 1  | 1  | 1  | 1  | 1  | 3  | 2  | 3  | <b>68</b> |
